# Supplementary material for: Extreme haplotype variation in the desiccation-tolerant clubmoss Selaginella lepidophylla
Source: PubMed Central journal article supplement (PMC5750206; doi:10.1038/s41467-017-02546-5), 2018-01-02
Supplement: 41467_2017_2546_MOESM1_ESM.pdf [file 41467_2017_2546_MOESM1_ESM.pdf]

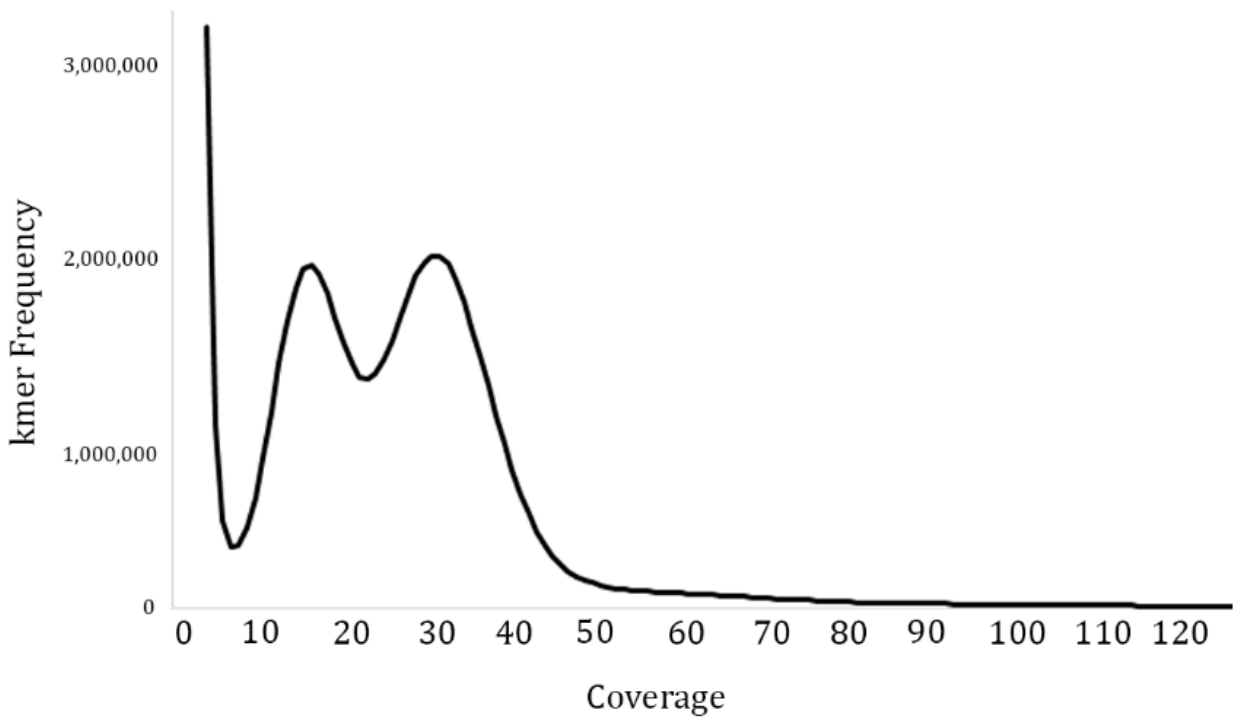

1

2 **Supplementary Figure 1.** High within genome heterozygosity of *S. lepidophyla*. A histogram of kmer  
3 frequency (k= 27) of Illumina reads is plotted. Frequency patterns display a bimodal curve indicating a  
4 high rate of within genome heterozygosity with an estimated diploid genome size of 109 Mb.

5

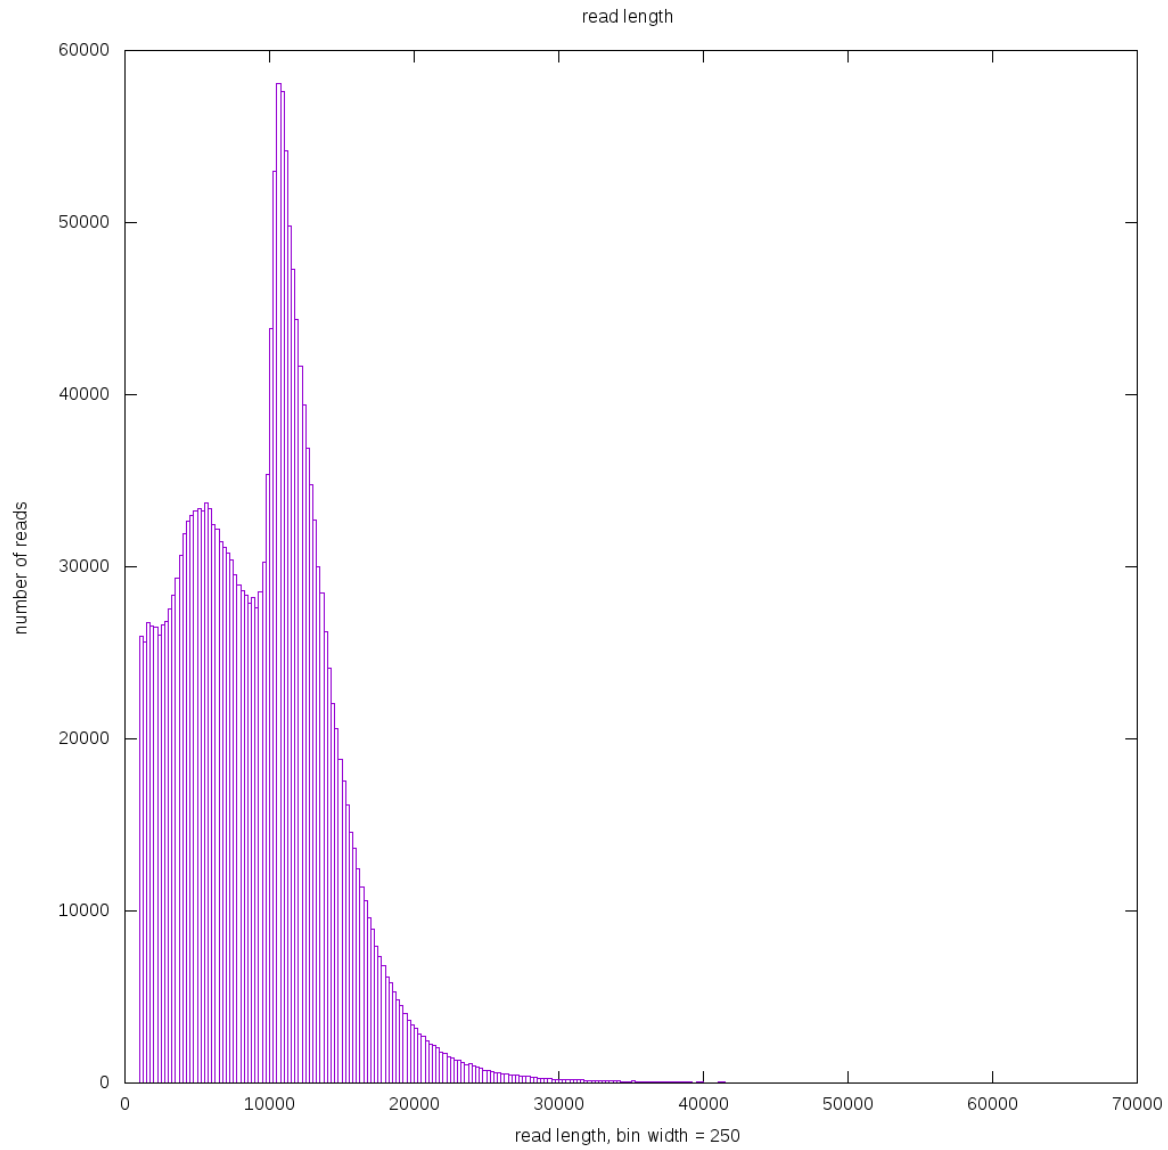

6

7

8 **Supplementary Figure 2.** Histogram of Subread length distribution of raw PacBio reads. The read length  
9 (bp) of raw PacBio reads is plotted on the x-axis.

10

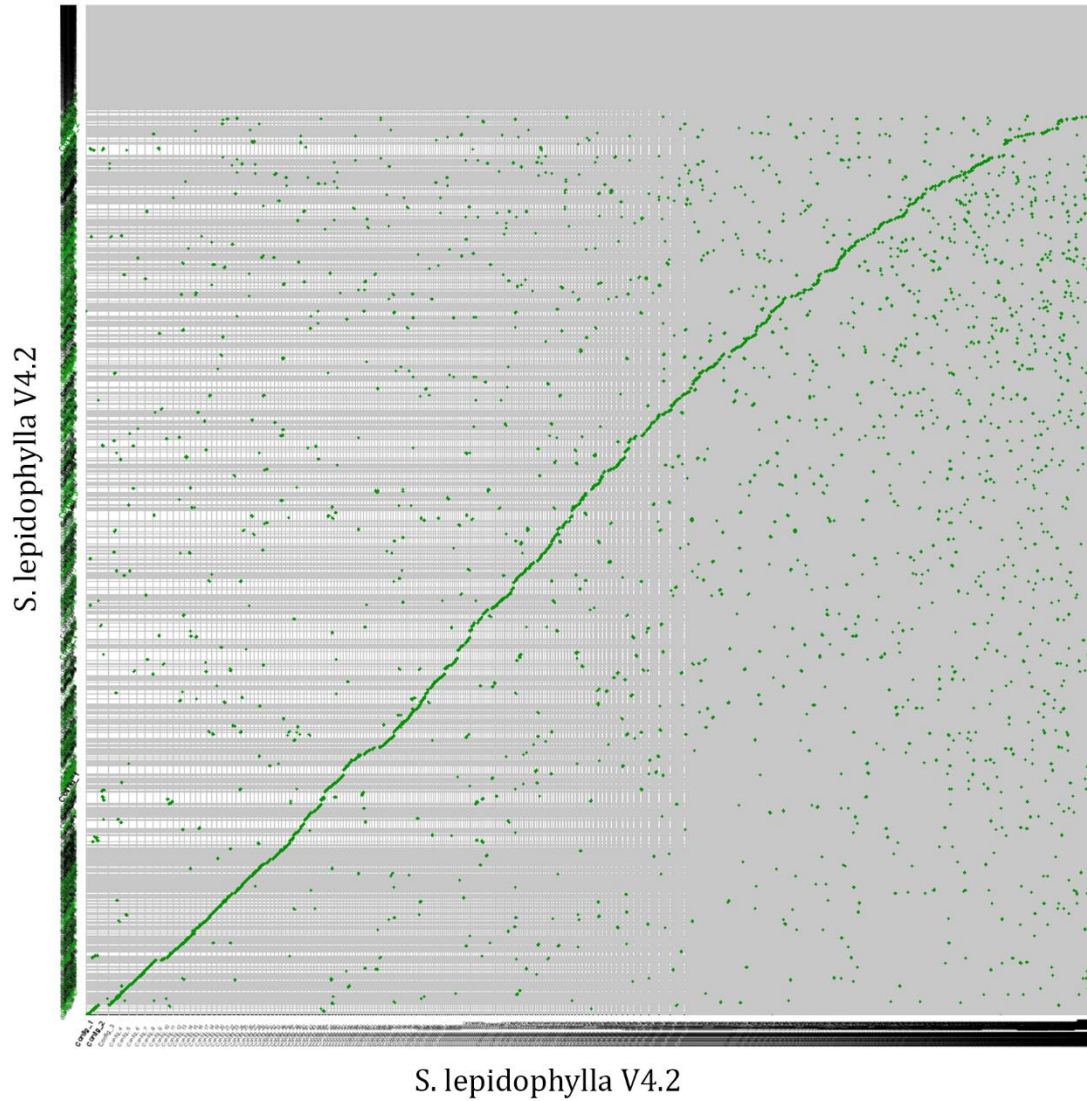

11

12 **Supplementary Figure 3.** Macrocytomic dot plot showing haplotype specific assembly across the *S.*  
13 *lepidophylla* genome. Green dots represents syntenic regions between the two haplotypes.

14

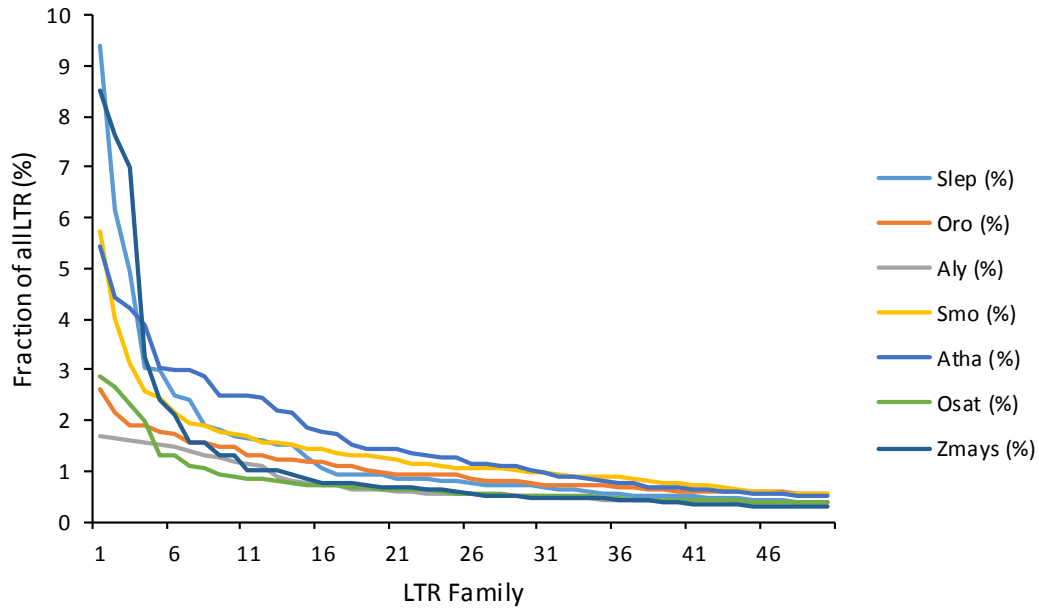

15

16 **Supplementary Figure 4. Replicability of LTR families in seven plant genomes.** Replicability of an  
 17 LTR family is defined by the proportion of the size of an LTR family to all LTR sequences in the  
 18 genome. The top 50 replicability of LTR families is plotted for each genome. *S. lepidophylla* has the most  
 19 replicable LTR families among the seven genomes, with a single LTR family contribute to 9.3% of all  
 20 LTR sequences. Slep, *S. lepidophylla*; Smo, *S. moellendorffii*; Oro, *Oropetium thomaeum*; Atha,  
 21 *Arabidopsis thaliana*; Aly, *A. lyrata*; Osat, *Oryza sativa*; Zmays, *Zea mays*.

22

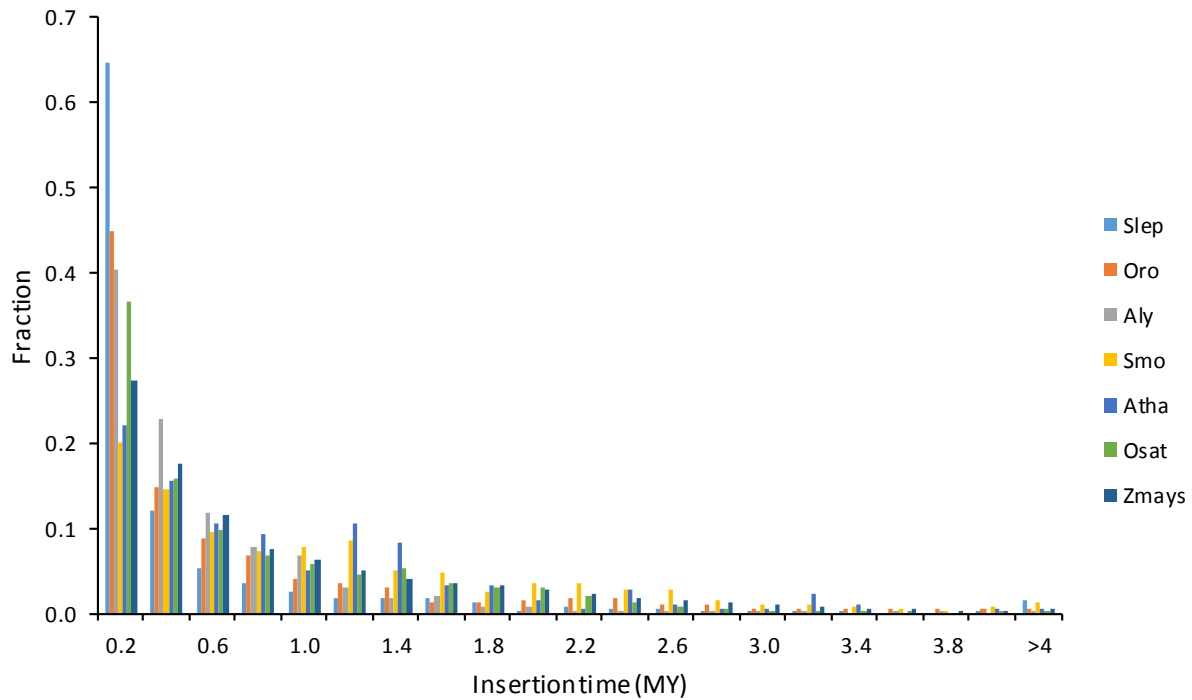

23

24 **Supplementary Figure 5. Insertion time distribution of seven plant genomes.** While most of intact  
 25 LTR retrotransposons were inserted within 4 million years (MY) ( $u=1.3 \times 10^{-8}$  per bp per year, sequence  
 26 divergence is corrected using the Jukes-Cantor model for non-coding sequences), the *S. lepidophylla*  
 27 genome has many more young LTR retrotransposons, with ~25% more LTRs inserted within 0.2 MY  
 28 comparing to other genomes. Y-axis denotes the proportion of the respective category in all cases. Slep,  
 29 *S. lepidophylla*; Smo, *S. moellendorffii*; Oro, *Oropetium thomaeum*; Atha, *Arabidopsis thaliana*;  
 30 Aly, *A. lyrata*; Osat, *Oryza sativa*; Zmays, *Zea mays*.

31

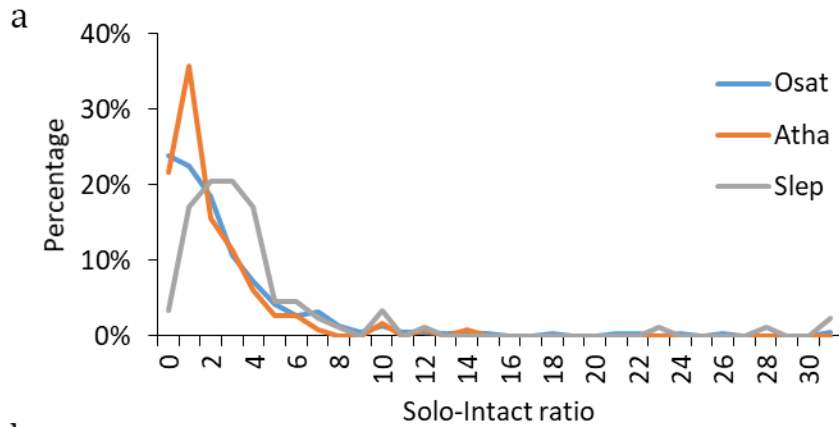

b

|                        | LTR length*      | Age (MY)           | S/I               |
|------------------------|------------------|--------------------|-------------------|
| <i>S. lepidophylla</i> | 512 <sup>a</sup> | 0.371 <sup>a</sup> | 4.06 <sup>a</sup> |
| <i>O. sativa</i>       | 535 <sup>a</sup> | 0.924 <sup>b</sup> | 2.71 <sup>b</sup> |
| <i>A. thaliana</i>     | 445 <sup>a</sup> | 0.938 <sup>b</sup> | 1.80 <sup>c</sup> |

32

33 **Supplementary Figure 6. Comparison of solo-intact (S/I) ratio of LTR retrotransposons in three**  
 34 **plant genomes.** (a) Distribution of S/I ratio of each LTR-RT family for three plant genomes. (b) Means  
 35 of LTR length, LTR age, and S/I ratio of each genome using the length-filtered dataset. Different letters in  
 36 each column indicate statistical significance by pairwise *t*-test ( $P < 0.05$ ). Osat, *Oryza. sativa*; Atha,  
 37 *Arabidopsis thaliana*; Slep, *S. lepidophylla*.

38 \*To remedy the LTR length effect in intra-element recombination, the 95 percentile of LTR length in  
 39 *Selaginella lepidophylla* (90-1540 bp) was used to screen for LTR-RT families that fell within this size  
 40 range in the rice and Arabidopsis genomes.

a

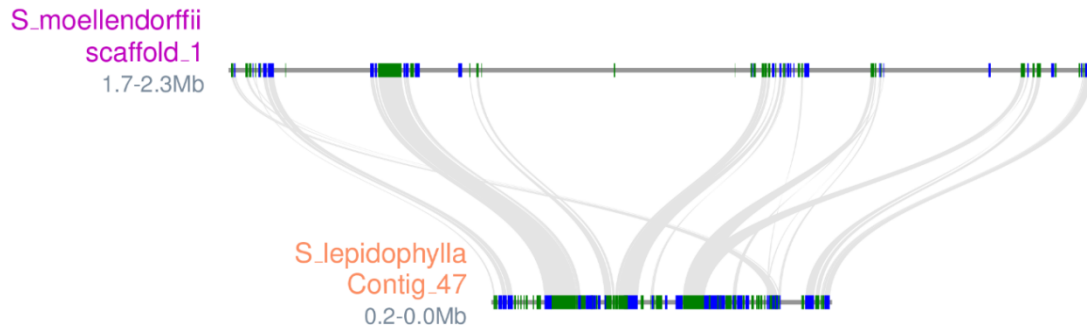

b

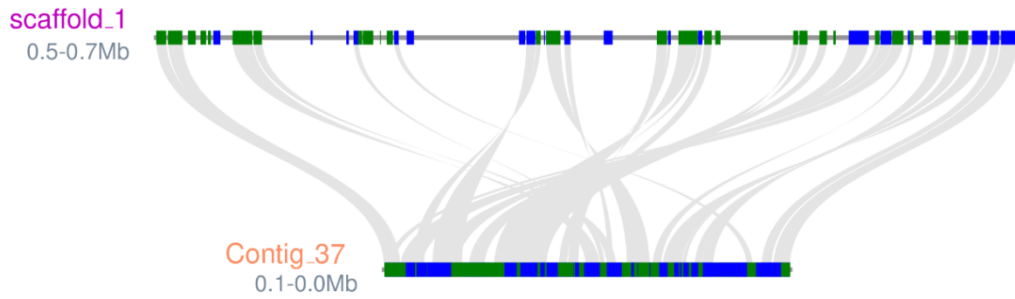

c

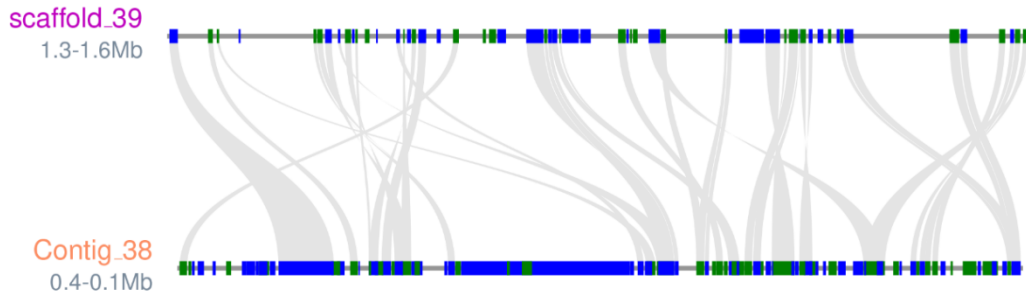

41

42 **Supplementary Figure 7.** Microsynteny between the *S. lepidophylla* and *S. moellendorffii* genomes.  
43 Genes are colored by orientation with blue correlating to forward and green reverse. Syntenic gene pairs  
44 are connected by grey lines.

45

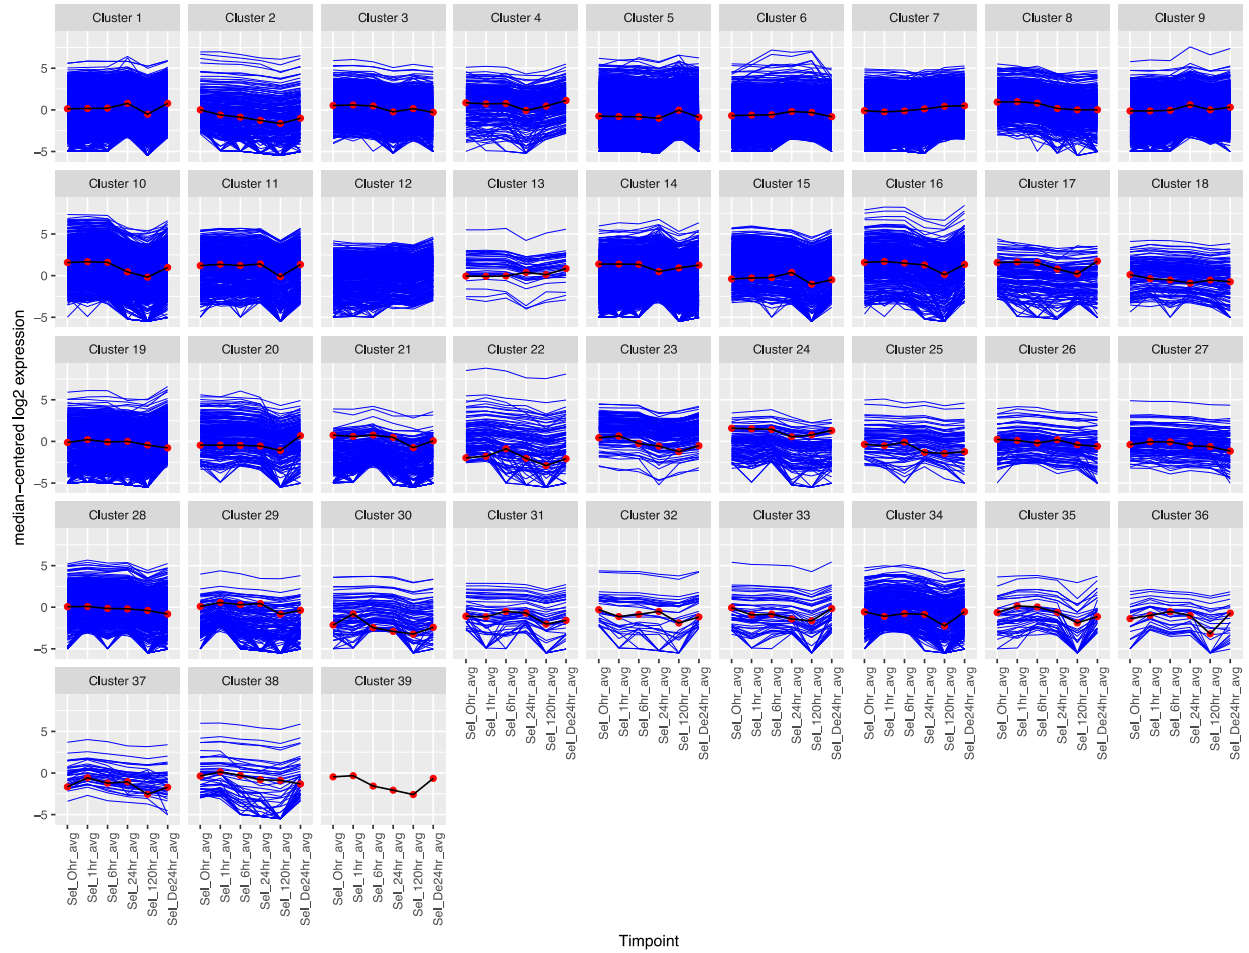

46

47 **Supplementary Figure 8.** WGCNA-based co-expression clusters across the *S. lepidophylla*  
 48 rehydration/desiccation timecourse. Median-centered Log2 TPMs are plotted for the complete set of  
 49 38 clusters.

50



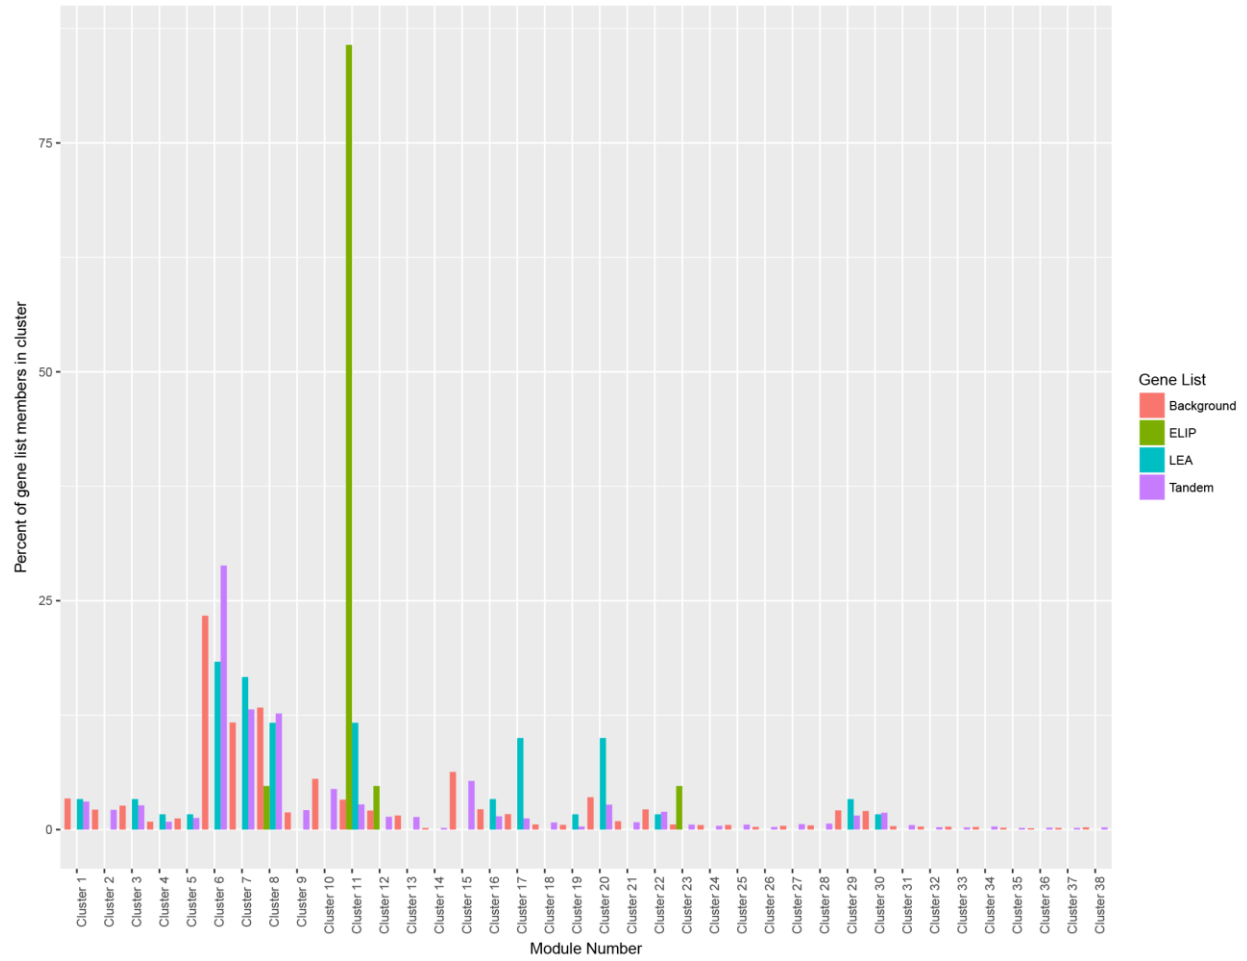

51

52 **Supplementary Figure 9. Enrichment of gene co-expression cluster in tandem duplicates and**  
 53 **desiccation related genes.** The background, tandem gene, LEA, and ELIP frequencies are presented for  
 54 each of the 38 coexpression modules.

55

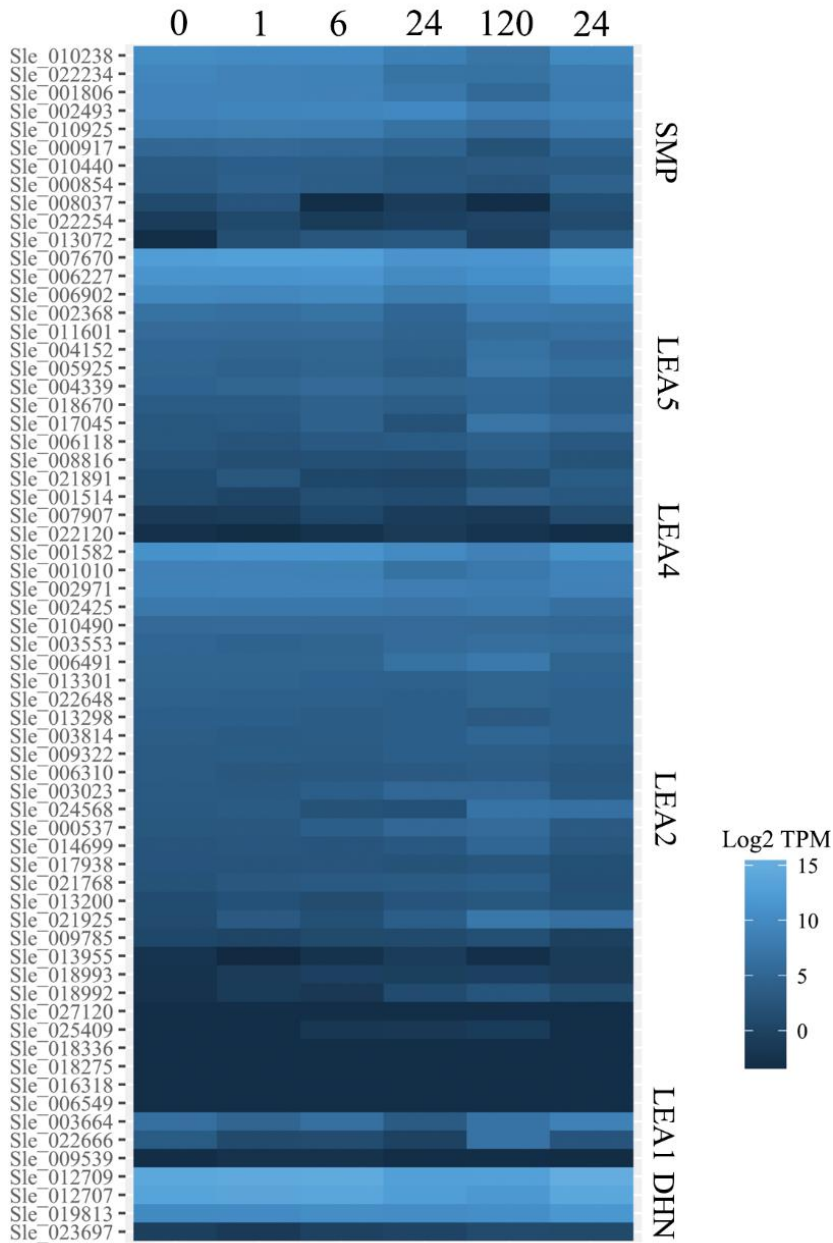

57

58 **Supplementary Figure 10.** Expression patterns of LEA proteins during the desiccation and rehydration  
 59 process in *S. lepidophylla*. Log<sub>2</sub> TPM (transcripts per million) is plotted for all 86 LEA proteins under the  
 60 6 time-points. LEA, Late Embryogenesis Abundant; SMP, Seed Maturation Protein; DHN, Dehydrin.

61 **Supplementary Table 1.** Summary statistics of the Illumina based *S. lepidophylla* genome assembly.

62

| <b>Assembly metric</b>     | <b>#</b>        |
|----------------------------|-----------------|
| Number of sequences        | 21,282          |
| Total size of sequences    | 53,779,066      |
| Longest sequence           | 42,938          |
| Shortest sequence          | 1,000           |
| Number of sequences > 10   | 0 (0%)          |
| Number of sequences > 100  | 0 (0%)          |
| Number of sequences > 1K   | 21,039 (98.86%) |
| Number of sequences > 10K  | 243 (1.14%)     |
| Number of sequences > 100K | 0 (0%)          |
| Number of sequences > 1M   | 0 (0%)          |
| Number of sequences > 10M  | 0 (0%)          |
| Mean sequence length       | 2,526           |
| Median sequence length     | 1,819           |
| Mode of sequence lengths   | 1,002           |
| N50 sequence length        | 3,022           |
| L50 sequence number        | 5,143           |
| N90 sequence length        | 1,253           |
| L90 sequence number        | 16,454          |

63

64

65 **Supplementary Table 2.** Final PacBio based *S. lepidophylla* genome assembly metrics.

| <b>Assembly metric</b>  | <b>#</b>    |
|-------------------------|-------------|
| Number of sequences     | 1,149       |
| Total size of sequences | 122,531,738 |
| Longest sequence        | 1430,794    |
| Shortest sequence       | 2,325       |
| N50 sequence length     | 163,247     |
| N90 sequence length     | 42,531      |

66

67

68 **Supplementary Table 3.** Assessment of annotation completeness using BUSCO.

|                                 | <i>S. lepidophylla</i> | <i>S. moellendorffii</i> |
|---------------------------------|------------------------|--------------------------|
| Complete BUSCOs                 | 292                    | 290                      |
| Complete and single-copy BUSCOs | 238                    | 250                      |
| Complete and duplicated BUSCOs  | 54                     | 40                       |
| Fragmented BUSCOs               | 8                      | 8                        |
| Missing BUSCOs                  | 3                      | 5                        |
| Total BUSCO groups searched     | 303                    | 303                      |
| <b>Total % complete</b>         | <b>96.3%</b>           | <b>95.7%</b>             |

69

70

71

72 **Supplementary Table 4.** Summary of transposable elements (TEs) and other repetitive sequences in the  
 73 *S. lepidophylla* genome

|          | Super-family                 | No. of TE <sup>a</sup> | Coverage (Mb) | Fraction of genome (%) |
|----------|------------------------------|------------------------|---------------|------------------------|
|          | <i>LTR/Copia</i>             | 1966                   | 0.71          | 0.58                   |
|          | <i>LTR/Gypsy</i>             | 18,959                 | 11.66         | 9.52                   |
|          | <i>LTR/Unknown</i>           | 6,008                  | 3.64          | 2.97                   |
| Class I  | LINE                         | 4,702                  | 4.35          | 3.55                   |
|          | <b>Total class I</b>         | 31,635                 | 20.36         | 16.62                  |
|          | <i>En/Spm/CACTA</i>          | 242                    | 0.07          | 0.06                   |
|          | <i>hAT</i>                   | 1,324                  | 0.52          | 0.42                   |
|          | <i>Helitron</i>              | 527                    | 0.45          | 0.37                   |
| Class II | <i>MULE/MuDR/Mutator</i>     | 2,633                  | 0.85          | 0.70                   |
|          | <i>PIF/Harbinger/Tourist</i> | 186                    | 0.08          | 0.07                   |
|          | <i>Sola</i>                  | 4,293                  | 5.34          | 4.36                   |
|          | Other                        | 5,120                  | 2.46          | 2.01                   |
|          | <b>Total class II</b>        | 14,325                 | 9.77          | 7.99                   |
|          | <b>Total TEs</b>             | 45,960                 | 30.13         | 24.61                  |
|          | Tandem repeats               | 22,989                 | 2.89          | 2.35                   |
|          | Other unknown repeats        | 19,900                 | 8.35          | 6.82                   |
|          | <b>Total repeats</b>         | 88,849                 | 41.37         | 33.78                  |

74 <sup>a</sup>Intact and fragmented.

75

76

77 **Supplementary Table 5.** Summary of intact LRT retrotransposons in *Selaginella*.

|         | <i>S. lepidophylla v4.2</i> |                          |                           |                          | <i>S. moellendorffii VI</i> |                          |                           |                          |
|---------|-----------------------------|--------------------------|---------------------------|--------------------------|-----------------------------|--------------------------|---------------------------|--------------------------|
|         | <b>Intact<br/>LTR #</b>     | <b>Contri<br/>bution</b> | <b>Genome<br/>content</b> | <b>Contrib<br/>ution</b> | <b>Intact<br/>LTR #</b>     | <b>Contrib<br/>ution</b> | <b>Genome<br/>content</b> | <b>Contri<br/>bution</b> |
| all     | 744                         | 100%                     | 13.07.%                   | 100%                     | 941                         | 100%                     | 30.70%                    | 100%                     |
| Copia   | 17                          | 2.28%                    | 0.58%                     | 4.43%                    | 58                          | 6.20%                    | 0.80%                     | 2.60%                    |
| Gypsy   | 572                         | 76.88%                   | 9.52%                     | 72.84%                   | 592                         | 62.90%                   | 17.20%                    | 56.10%                   |
| Unknown | 155                         | 20.83%                   | 2.97%                     | 22.72%                   | 291                         | 30.90%                   | 13.70%                    | 44.60%                   |

78

79

**Supplementary Table 6.** Detailed descriptions of regions with haplotype specific structural variation.

| Haplotype 1 | Haplotype 2 | Start H1 | End H1 | Start H2 | End H2 | Haplotype SV | Start SV | End SV | Size (bp) | Orientation |
|-------------|-------------|----------|--------|----------|--------|--------------|----------|--------|-----------|-------------|
| Contig_1    | Contig_45   | 570967   | 935971 | 25345    | 397879 | Contig_45    | 876198   | 897063 | 20865     | -           |
| Contig_1    | Contig_58   | 9188     | 384824 | 1        | 326719 | Contig_1     | 73848    | 90490  | 16642     | -           |
| Contig_3    | Contig_162  | 658740   | 814537 | 5254     | 180589 | Contig_162   | 41141    | 50135  | 8994      | -           |
| Contig_3    | Contig_162  | 658740   | 814537 | 5254     | 180589 | Contig_162   | 54565    | 66105  | 11540     | -           |
| Contig_3    | Contig_172  | 284598   | 340520 | 12373    | 87495  | Contig_172   | 58549    | 84752  | 26203     | +           |
| Contig_3    | Contig_311  | 144436   | 279562 | 1        | 111894 | Contig_311   | 22204    | 31259  | 9055      | -           |
| Contig_3    | Contig_418  | 842263   | 975475 | 1        | 87210  | Contig_3     | 882019   | 933446 | 51427     | +           |
| Contig_4    | Contig_499  | 446557   | 568327 | 1        | 70665  | Contig_4     | 506670   | 545417 | 38747     |             |
| Contig_4    | Contig_97   | 152663   | 371645 | 5721     | 249333 | Contig_97    | 64303    | 118882 | 54579     | +           |
| Contig_4    | Contig_97   | 152663   | 371645 | 5721     | 249333 | Contig_97    | 154396   | 182993 | 28597     |             |
| Contig_4    | Contig_212  | 609377   | 734421 | 1        | 143257 | Contig_212   | 85548    | 108214 | 22666     | -           |
| Contig_4    | Contig_438  | 768607   | 869024 | 1        | 83725  | Contig_4     | 784020   | 813294 | 29274     | -           |
| Contig_5    | Contig_103  | 774842   | 949566 | 43355    | 243028 | Contig_103   | 84750    | 101742 | 16992     | -           |
| Contig_5    | Contig_409  | 335290   | 392597 | 1        | 77123  | Contig_409   | 16670    | 27393  | 10723     | -           |
| Contig_5    | Contig_453  | 566615   | 633086 | 1        | 79520  | Contig_453   | 18835    | 46288  | 27453     | +           |
| Contig_6    | Contig_52   | 525828   | 878440 | 1        | 367130 | Contig_52    | 172890   | 253269 | 80379     | +           |
| Contig_6    | Contig_229  | 133298   | 300684 | 1        | 135847 | Contig_229   | 197491   | 229020 | 31529     | +           |
| Contig_6    | Contig_477  | 79775    | 139953 | 1        | 75872  | Contig_477   | 24544    | 35018  | 10474     | -           |
| Contig_7    | Contig_39   | 364953   | 775373 | 3        | 431357 | Contig_7     | 691318   | 748059 | 56741     | -           |
| Contig_7    | Contig_124  | 1        | 243664 | 11688    | 213890 | Contig_124   | 159581   | 173566 | 13985     | +           |
| Contig_9    | Contig_263  | 233182   | 372316 | 1        | 127773 | Contig_263   | 303539   | 317336 | 13797     | -           |
| Contig_10   | Contig_110  | 16982    | 206203 | 1        | 139926 | Contig_10    | 106327   | 118861 | 12534     | -           |
| Contig_10   | Contig_510  | 601391   | 671852 | 1        | 49878  | Contig_10    | 633386   | 647134 | 13748     | +           |
| Contig_11   | Contig_127  | 1        | 243081 | 1        | 204868 | Contig_127   | 34334    | 51459  | 17125     | -           |
| Contig_11   | Contig_247  | 577386   | 705787 | 1        | 132377 | Contig_11    | 630397   | 652352 | 21955     | -           |
| Contig_11   | Contig_444  | 273538   | 348985 | 2        | 78829  | Contig_444   | 31377    | 42170  | 10793     | -           |
| Contig_12   | Contig_69   | 26473    | 321544 | 1        | 310061 | Contig_12    | 286076   | 304454 | 18378     | +           |
| Contig_12   | Contig_204  | 456924   | 578013 | 1        | 147538 | Contig_204   | 62549    | 71058  | 8509      | +           |



|           |            |        |        |       |        |            |        |        |       |   |
|-----------|------------|--------|--------|-------|--------|------------|--------|--------|-------|---|
| Contig_12 | Contig_204 | 456924 | 578013 | 1     | 147538 | Contig_204 | 126320 | 137965 | 11645 | + |
| Contig_13 | Contig_179 | 309155 | 496838 | 74    | 161583 | Contig_179 | 337493 | 393559 | 56066 | + |
| Contig_13 | Contig_179 | 309155 | 496838 | 74    | 161583 | Contig_179 | 28512  | 66189  | 37677 | + |
| Contig_13 | Contig_202 | 3719   | 193856 | 1     | 148977 | Contig_13  | 124510 | 143499 | 18989 | + |
| Contig_13 | Contig_249 | 183097 | 277128 | 230   | 132225 | Contig_249 | 35011  | 86345  | 51334 | + |
| Contig_14 | Contig_177 | 120    | 161516 | 1     | 155510 | Contig_14  | 101004 | 107467 | 6463  | - |
| Contig_15 | Contig_91  | 427651 | 653180 | 10169 | 259467 | Contig_91  | 148794 | 191689 | 42895 | - |
| Contig_15 | Contig_252 | 221785 | 428627 | 1     | 131772 | Contig_15  | 283838 | 348556 | 64718 | - |
| Contig_15 | Contig_382 | 1810   | 89279  | 3849  | 95472  | Contig_382 | 52946  | 72739  | 19793 | + |
| Contig_16 | Contig_208 | 93517  | 237015 | 1     | 146747 | Contig_208 | 85887  | 109606 | 23719 | - |
| Contig_16 | Contig_331 | 41062  | 96709  | 1     | 76297  | Contig_331 | 10929  | 25371  | 14442 | - |
| Contig_17 | Contig_131 | 441024 | 635661 | 5660  | 208829 | Contig_131 | 32148  | 73885  | 41737 | - |
| Contig_17 | Contig_155 | 311221 | 423837 | 1     | 188526 | Contig_155 | 55102  | 123654 | 68552 | + |
| Contig_18 | Contig_109 | 340783 | 595952 | 612   | 238172 | Contig_18  | 405247 | 418762 | 13515 | - |
| Contig_18 | Contig_114 | 135141 | 338884 | 1     | 229077 | Contig_114 | 47500  | 98832  | 51332 | + |
| Contig_19 | Contig_289 | 1      | 76070  | 52290 | 117244 | Contig_19  | 10877  | 26925  | 16048 | - |
| Contig_19 | Contig_319 | 463564 | 598156 | 1     | 109868 | Contig_319 | 19698  | 28487  | 8789  | - |
| Contig_20 | Contig_298 | 8116   | 160069 | 1     | 159583 | Contig_20  | 25148  | 32280  | 7132  | + |
| Contig_20 | Contig_298 | 8116   | 160069 | 1     | 159583 | Contig_298 | 91658  | 101497 | 9839  | + |
| Contig_20 | Contig_81  | 275035 | 519308 | 1     | 277101 | Contig_81  | 235467 | 255930 | 20463 | + |
| Contig_21 | Contig_255 | 486651 | 582019 | 1     | 121155 | Contig_255 | 86349  | 104155 | 17806 | + |
| Contig_21 | Contig_270 | 363376 | 488359 | 6296  | 124912 | Contig_270 | 12721  | 20846  | 8125  | + |
| Contig_21 | Contig_270 | 363376 | 488359 | 6296  | 124912 | Contig_21  | 392923 | 409384 | 16461 | + |
| Contig_23 | Contig_216 | 375753 | 529872 | 1     | 141928 | Contig_23  | 469761 | 494328 | 24567 | - |
| Contig_25 | Contig_184 | 166162 | 356263 | 1054  | 158533 | Contig_25  | 237978 | 283780 | 45802 | + |
| Contig_27 | Contig_265 | 300343 | 404657 | 1     | 127446 | Contig_265 | 61436  | 107580 | 46144 | + |
| Contig_28 | Contig_104 | 1      | 213903 | 1765  | 242909 | Contig_104 | 99574  | 123422 | 23848 | + |
| Contig_28 | Contig_95  | 395201 | 472584 | 12615 | 69499  | Contig_28  | 413621 | 449854 | 36233 | + |
| Contig_28 | Contig_443 | 234014 | 308104 | 1     | 82353  | Contig_443 | 18119  | 31965  | 13846 | + |
| Contig_30 | Contig_220 | 263480 | 328845 | 23748 | 141506 | Contig_220 | 89455  | 108697 | 19242 | - |
| Contig_31 | Contig_243 | 217523 | 369885 | 6724  | 131475 | Contig_31  | 281242 | 313564 | 32322 | + |

|           |            |        |        |       |        |            |        |        |       |   |
|-----------|------------|--------|--------|-------|--------|------------|--------|--------|-------|---|
| Contig_32 | Contig_227 | 1      | 63055  | 1     | 65597  | Contig_227 | 18095  | 27037  | 8942  | - |
| Contig_32 | Contig_168 | 71810  | 254998 | 185   | 174718 | Contig_168 | 69251  | 77928  | 8677  | + |
| Contig_33 | Contig_473 | 187911 | 269554 | 1     | 76059  | Contig_33  | 205288 | 218038 | 12750 | + |
| Contig_33 | Contig_473 | 187911 | 269554 | 1     | 76059  | Contig_33  | 230827 | 246221 | 15394 | + |
| Contig_33 | Contig_473 | 187911 | 269554 | 1     | 76059  | Contig_473 | 42826  | 52711  | 9885  | + |
| Contig_33 | Contig_302 | 268544 | 394756 | 1     | 115335 | Contig_33  | 287924 | 298009 | 10085 | + |
| Contig_34 | Contig_315 | 99264  | 211816 | 1     | 110835 | Contig_34  | 115232 | 126910 | 11678 | + |
| Contig_35 | Contig_188 | 22049  | 160652 | 1     | 90946  | Contig_35  | 106282 | 114886 | 8604  | - |
| Contig_35 | Contig_188 | 22049  | 160652 | 1     | 90946  | Contig_35  | 55234  | 68474  | 13240 | - |
| Contig_35 | Contig_83  | 177502 | 438066 | 1577  | 275929 | Contig_35  | 189040 | 218235 | 29195 | - |
| Contig_37 | Contig_86  | 69743  | 356984 | 1     | 268794 | Contig_37  | 258396 | 303086 | 44690 | + |
| Contig_37 | Contig_86  | 69743  | 356984 | 1     | 268794 | Contig_86  | 156976 | 189481 | 32505 | + |
| Contig_38 | Contig_329 | 57591  | 137070 | 18698 | 106858 | Contig_329 | 34513  | 51253  | 16740 | - |
| Contig_40 | Contig_105 | 76894  | 298450 | 1     | 211749 | Contig_105 | 118228 | 130555 | 12327 | + |
| Contig_40 | Contig_105 | 76894  | 298450 | 1     | 211749 | Contig_40  | 156725 | 169525 | 12800 | + |
| Contig_41 | Contig_432 | 205742 | 282318 | 1     | 84472  | Contig_432 | 18373  | 29051  | 10678 | + |
| Contig_41 | Contig_432 | 205742 | 282318 | 1     | 84472  | Contig_41  | 226664 | 237228 | 10564 | + |
| Contig_44 | Contig_156 | 72238  | 214844 | 1     | 167983 | Contig_156 | 15859  | 21122  | 5263  | + |
| Contig_44 | Contig_156 | 72238  | 214844 | 1     | 167983 | Contig_156 | 26126  | 37578  | 11452 | + |
| Contig_46 | Contig_143 | 110440 | 326244 | 1     | 197827 | Contig_143 | 130412 | 161990 | 31578 | + |
| Contig_48 | Contig_133 | 154213 | 344974 | 23065 | 206653 | Contig_48  | 199045 | 215608 | 16563 | - |
| Contig_50 | Contig_304 | 8155   | 145918 | 1     | 115038 | Contig_50  | 23975  | 39144  | 15169 | - |
| Contig_54 | Contig_321 | 101346 | 211713 | 1     | 108742 | Contig_321 | 35224  | 49477  | 14253 | + |
| Contig_56 | Contig_136 | 32921  | 279146 | 38571 | 203372 | Contig_56  | 79691  | 156719 | 77028 | + |
| Contig_72 | Contig_75  | 1      | 183536 | 89784 | 296310 | Contig_75  | 194370 | 214660 | 20290 | + |
| Contig_78 | Contig_96  | 5052   | 252065 | 1     | 242082 | Contig_96  | 102926 | 163896 | 60970 | + |
| Contig_87 | Contig_152 | 18953  | 199359 | 1     | 167861 | Contig_87  | 146125 | 179835 | 33710 | - |
| Contig_95 | Contig_147 | 87698  | 254320 | 12498 | 193676 | Contig_147 | 86210  | 93538  | 7328  | + |
| Contig_93 | Contig_170 | 14233  | 209017 | 1     | 170848 | Contig_93  | 105061 | 125291 | 20230 | + |
| Contig_89 | Contig_250 | 1      | 70121  | 4318  | 131961 | Contig_250 | 23602  | 57954  | 34352 | + |
| Contig_89 | Contig_250 | 1      | 70121  | 4318  | 131961 | Contig_250 | 86132  | 125530 | 39398 | + |

|            |            |       |        |       |        |            |        |        |       |   |
|------------|------------|-------|--------|-------|--------|------------|--------|--------|-------|---|
| Contig_100 | Contig_276 | 96075 | 223132 | 1     | 123128 | Contig_100 | 124054 | 141653 | 17599 | - |
| Contig_100 | Contig_276 | 96075 | 223132 | 1     | 123128 | Contig_276 | 65645  | 71630  | 5985  | - |
| Contig_117 | Contig_142 | 1129  | 227761 | 1     | 186773 | Contig_117 | 108948 | 163253 | 54305 | + |
| Contig_129 | Contig_200 | 1641  | 104553 | 1     | 149307 | Contig_200 | 21391  | 59479  | 38088 | + |
| Contig_121 | Contig_305 | 62719 | 217554 | 1     | 114956 | Contig_121 | 72212  | 117069 | 44857 | + |
| Contig_148 | Contig_284 | 37268 | 135772 | 1     | 121663 | Contig_284 | 21766  | 44890  | 23124 | + |
| Contig_158 | Contig_191 | 1     | 162794 | 2009  | 155210 | Contig_158 | 29371  | 37264  | 7893  | + |
| Contig_197 | Contig_237 | 7706  | 130305 | 21863 | 133784 | Contig_197 | 84196  | 110961 | 26765 | - |
| Contig_182 | Contig_253 | 3061  | 144221 | 7     | 131626 | Contig_253 | 109599 | 114479 | 4880  | + |
| Contig_182 | Contig_253 | 3061  | 144221 | 7     | 131626 | Contig_182 | 83080  | 93117  | 10037 | + |
| Contig_307 | Contig_433 | 4364  | 107121 | 1     | 81352  | Contig_307 | 34651  | 45148  | 10497 | + |
| Contig_307 | Contig_433 | 4364  | 107121 | 1     | 81352  | Contig_307 | 47691  | 64801  | 17110 | + |
| Contig_447 | Contig_435 | 1     | 77321  | 6858  | 84009  | Contig_435 | 18317  | 41989  | 23672 | - |
| Contig_447 | Contig_435 | 1     | 77321  | 6858  | 84009  | Contig_435 | 31386  | 42272  | 10886 | - |

**Supplementary Table 7.** Enriched GO terms of tandem gene duplicates in *S. lepidophylla*.

| <b>pathway ID</b> | <b>pathway description</b>                                      | <b>observed gene count</b> | <b>false discovery rate</b> |
|-------------------|-----------------------------------------------------------------|----------------------------|-----------------------------|
| GO.0004674        | protein serine/threonine kinase activity                        | 161                        | 1.13E-100                   |
| GO.0004672        | protein kinase activity                                         | 167                        | 4.61E-100                   |
| GO.0001653        | peptide receptor activity                                       | 97                         | 8.08E-89                    |
| GO.0004675        | transmembrane receptor protein serine/threonine kinase activity | 96                         | 3.42E-88                    |
| GO.0004888        | transmembrane signaling receptor activity                       | 97                         | 4.84E-86                    |
| GO.0020037        | heme binding                                                    | 101                        | 8.31E-85                    |
| GO.0004497        | monooxygenase activity                                          | 89                         | 2.15E-82                    |
| GO.0031625        | ubiquitin protein ligase binding                                | 97                         | 9.93E-82                    |
| GO.0005506        | iron ion binding                                                | 90                         | 4.30E-75                    |
| GO.0016705        | oxidoreductase activity                                         | 90                         | 7.61E-66                    |
| GO.0004871        | signal transducer activity                                      | 98                         | 5.08E-63                    |
| GO.0016709        | oxidoreductase activity                                         | 63                         | 2.10E-58                    |
| GO.1901363        | heterocyclic compound binding                                   | 321                        | 1.97E-54                    |
| GO.0097159        | organic cyclic compound binding                                 | 321                        | 2.20E-54                    |
| GO.0005524        | ATP binding                                                     | 181                        | 3.87E-50                    |
| GO.0035639        | purine ribonucleoside triphosphate binding                      | 190                        | 1.85E-49                    |
| GO.0032550        | purine ribonucleoside binding                                   | 190                        | 2.56E-49                    |
| GO.0003824        | catalytic activity                                              | 356                        | 8.78E-49                    |
| GO.0032555        | purine ribonucleotide binding                                   | 190                        | 1.00E-48                    |
| GO.0032553        | ribonucleotide binding                                          | 191                        | 1.86E-48                    |
| GO.0043167        | ion binding                                                     | 307                        | 1.94E-48                    |
| GO.0030246        | carbohydrate binding                                            | 72                         | 1.29E-46                    |
| GO.0016740        | transferase activity                                            | 195                        | 1.01E-42                    |
| GO.0005515        | protein binding                                                 | 123                        | 2.28E-42                    |
| GO.0043168        | anion binding                                                   | 195                        | 7.59E-40                    |
| GO.0000166        | nucleotide binding                                              | 192                        | 6.27E-39                    |
| GO.0036094        | small molecule binding                                          | 196                        | 8.03E-39                    |
| GO.0016491        | oxidoreductase activity                                         | 105                        | 1.24E-25                    |
| GO.0005488        | binding                                                         | 325                        | 2.26E-22                    |
| GO.0005516        | calmodulin binding                                              | 30                         | 4.06E-20                    |
| GO.0046914        | transition metal ion binding                                    | 92                         | 9.42E-19                    |
| GO.0003674        | molecular_function                                              | 389                        | 6.13E-18                    |
| GO.0016713        | oxidoreductase activity                                         | 8                          | 2.55E-10                    |
| GO.0018685        | alkane 1-monooxygenase activity                                 | 7                          | 9.65E-10                    |
| GO.0015112        | nitrate transmembrane transporter activity                      | 9                          | 3.52E-09                    |
| GO.0004366        | glycerol-3-phosphate O-acyltransferase activity                 | 6                          | 2.14E-07                    |
| GO.0005200        | structural constituent of cytoskeleton                          | 9                          | 6.96E-07                    |
| GO.0003682        | chromatin binding                                               | 21                         | 8.43E-07                    |
| GO.0070330        | aromatase activity                                              | 5                          | 9.73E-07                    |

|            |                                                         |    |          |
|------------|---------------------------------------------------------|----|----------|
| GO.0090447 | glycerol-3-phosphate 2-O-acyltransferase activity       | 5  | 9.73E-07 |
| GO.0008422 | beta-glucosidase activity                               | 12 | 7.02E-06 |
| GO.0004737 | pyruvate decarboxylase activity                         | 4  | 3.07E-05 |
| GO.0042936 | dipeptide transporter activity                          | 4  | 3.07E-05 |
| GO.0080054 | low-affinity nitrate transmembrane transporter activity | 4  | 3.07E-05 |
| GO.0000293 | ferric-chelate reductase activity                       | 5  | 4.59E-05 |

---

**Supplementary Table 8.** Enriched KEGG pathways of tandem gene duplicates in *S. lepidophylla*.

| <b>pathway ID</b> | <b>pathway description</b>                   | <b>observed gene count</b> | <b>false discovery rate</b> |
|-------------------|----------------------------------------------|----------------------------|-----------------------------|
| 945               | Stilbenoid                                   | 46                         | 5.23E-54                    |
| 903               | Limonene and pinene degradation              | 45                         | 6.66E-53                    |
| 1110              | Biosynthesis of secondary metabolites        | 85                         | 1.34E-17                    |
| 1120              | Microbial metabolism in diverse environments | 45                         | 1.94E-14                    |
| 940               | Phenylpropanoid biosynthesis                 | 28                         | 1.32E-13                    |
| 460               | Cyanoamino acid metabolism                   | 13                         | 2.09E-07                    |
| 73                | Cutin                                        | 8                          | 3.65E-06                    |
| 966               | Glucosinolate biosynthesis                   | 7                          | 1.21E-05                    |
| 1100              | Metabolic pathways                           | 90                         | 1.22E-05                    |
| 561               | Glycerolipid metabolism                      | 8                          | 0.00159                     |
| 360               | Phenylalanine metabolism                     | 11                         | 0.00528                     |
| 4145              | Phagosome                                    | 8                          | 0.0261                      |
| 564               | Glycerophospholipid metabolism               | 8                          | 0.0305                      |
| 1210              | 2-Oxocarboxylic acid metabolism              | 7                          | 0.0477                      |

**Supplementary Table 9.** Enriched GO terms of tandem gene duplicates in *S. moellendorffii*.

| <b>pathway ID</b> | <b>pathway description</b>                                      | <b>observed<br/>gene count</b> | <b>false<br/>discovery<br/>rate</b> |
|-------------------|-----------------------------------------------------------------|--------------------------------|-------------------------------------|
| GO.0020037        | heme binding                                                    | 133                            | 2.27E-105                           |
| GO.0097159        | organic cyclic compound binding                                 | 484                            | 4.34E-75                            |
| GO.1901363        | heterocyclic compound binding                                   | 484                            | 4.34E-75                            |
| GO.0004497        | monooxygenase activity                                          | 93                             | 1.14E-69                            |
| GO.0005506        | iron ion binding                                                | 95                             | 6.14E-63                            |
| GO.0016705        | oxidoreductase activity                                         | 95                             | 2.15E-53                            |
| GO.0043167        | ion binding                                                     | 426                            | 1.36E-49                            |
| GO.0005488        | binding                                                         | 537                            | 6.26E-44                            |
| GO.0004674        | protein serine/threonine kinase activity                        | 122                            | 3.75E-39                            |
| GO.0004672        | protein kinase activity                                         | 128                            | 1.31E-38                            |
| GO.0016491        | oxidoreductase activity                                         | 145                            | 4.42E-29                            |
| GO.0001653        | peptide receptor activity                                       | 60                             | 9.95E-29                            |
| GO.0003674        | molecular_function                                              | 615                            | 1.15E-28                            |
| GO.0004675        | transmembrane receptor protein serine/threonine kinase activity | 59                             | 2.86E-28                            |
| GO.0004888        | transmembrane signaling receptor activity                       | 61                             | 2.86E-28                            |
| GO.0046914        | transition metal ion binding                                    | 142                            | 2.86E-28                            |
| GO.0043531        | ADP binding                                                     | 39                             | 3.39E-28                            |
| GO.0032559        | adenyl ribonucleotide binding                                   | 192                            | 6.47E-27                            |
| GO.0005524        | ATP binding                                                     | 190                            | 7.72E-27                            |
| GO.0003700        | transcription factor activity                                   | 143                            | 1.03E-26                            |
| GO.0031625        | ubiquitin protein ligase binding                                | 60                             | 2.73E-25                            |
| GO.0032550        | purine ribonucleoside binding                                   | 197                            | 2.68E-24                            |
| GO.0004872        | receptor activity                                               | 62                             | 7.35E-24                            |
| GO.0032555        | purine ribonucleotide binding                                   | 197                            | 8.43E-24                            |
| GO.0035639        | purine ribonucleoside triphosphate binding                      | 195                            | 1.07E-23                            |
| GO.0032553        | ribonucleotide binding                                          | 198                            | 1.75E-23                            |
| GO.0004601        | peroxidase activity                                             | 39                             | 5.96E-20                            |
| GO.0019899        | enzyme binding                                                  | 61                             | 4.63E-19                            |
| GO.0043168        | anion binding                                                   | 206                            | 1.13E-17                            |
| GO.0004871        | signal transducer activity                                      | 62                             | 5.54E-17                            |
| GO.0046872        | metal ion binding                                               | 221                            | 8.63E-17                            |
| GO.0000166        | nucleotide binding                                              | 201                            | 1.27E-16                            |
| GO.0060089        | molecular transducer activity                                   | 63                             | 2.71E-16                            |
| GO.0005516        | calmodulin binding                                              | 30                             | 1.11E-14                            |
| GO.0003677        | DNA binding                                                     | 149                            | 3.10E-13                            |
| GO.0003824        | catalytic activity                                              | 379                            | 1.18E-12                            |
| GO.0015238        | drug transmembrane transporter activity                         | 14                             | 3.75E-09                            |

|            |                                                     |     |          |
|------------|-----------------------------------------------------|-----|----------|
| GO.0005515 | protein binding                                     | 90  | 9.61E-09 |
| GO.0018685 | alkane 1-monooxygenase activity                     | 7   | 2.03E-08 |
| GO.0050105 | L-gulonolactone oxidase activity                    | 7   | 2.03E-08 |
| GO.0015293 | symporter activity                                  | 23  | 4.52E-08 |
| GO.0030246 | carbohydrate binding                                | 37  | 1.07E-07 |
| GO.0015112 | nitrate transmembrane transporter activity          | 9   | 1.61E-07 |
| GO.0044212 | transcription regulatory region DNA binding         | 23  | 2.16E-07 |
| GO.0015291 | secondary active transmembrane transporter activity | 32  | 2.02E-06 |
| GO.0005215 | transporter activity                                | 81  | 2.39E-06 |
| GO.0070330 | aromatase activity                                  | 5   | 7.85E-06 |
| GO.0016740 | transferase activity                                | 153 | 3.44E-05 |
| GO.0022804 | active transmembrane transporter activity           | 40  | 3.44E-05 |
| GO.0003676 | nucleic acid binding                                | 155 | 5.56E-05 |
| GO.0005355 | glucose transmembrane transporter activity          | 9   | 7.54E-05 |

---



**Supplementary Table 10.** Enriched KEGG pathways of tandem gene duplicates in *S. moellendorffii*.

| <b>pathway ID</b> | <b>pathway description</b>                                                               | <b>observed gene count</b> | <b>false discovery rate</b> |
|-------------------|------------------------------------------------------------------------------------------|----------------------------|-----------------------------|
| 945               | Stilbenoid                                                                               | 49                         | 3.76E-50                    |
| 903               | Limonene and pinene degradation                                                          | 48                         | 3.17E-49                    |
| 940               | Phenylpropanoid biosynthesis                                                             | 53                         | 5.06E-31                    |
| 360               | Phenylalanine metabolism                                                                 | 36                         | 1.42E-19                    |
| 1110              | Biosynthesis of secondary metabolites<br>Microbial metabolism in diverse<br>environments | 116                        | 2.18E-19                    |
| 1120              | environments                                                                             | 48                         | 2.15E-09                    |
| 591               | Linoleic acid metabolism                                                                 | 6                          | 1.46E-05                    |
| 460               | Cyanoamino acid metabolism                                                               | 13                         | 2.95E-05                    |
| 73                | Cutin                                                                                    | 8                          | 8.72E-05                    |

**Supplementary Table 11.** Summary of Orthogroup classifications.

|                                                     | <b>Arabidopsis</b> | <b>Rice</b> | <b>Oropetium</b> | <b>Poplar</b> | <i>S. lepodiphylla</i> | <i>S. moellendorffii</i> | <b>Grape</b> |
|-----------------------------------------------------|--------------------|-------------|------------------|---------------|------------------------|--------------------------|--------------|
| Number of genes                                     | 27,416             | 39,049      | 28,437           | 42,950        | 27,204                 | 22,285                   | 26,346       |
| Number of genes in orthogroups                      | 22,530             | 24,890      | 19,245           | 32,069        | 17,134                 | 16,466                   | 19,532       |
| Number of unassigned genes                          | 4,886              | 14,159      | 9,192            | 10,881        | 10,070                 | 5,819                    | 68,14        |
| Percentage of genes in orthogroups                  | 82.2               | 63.7        | 67.7             | 74.7          | 63                     | 73.9                     | 74.1         |
| Percentage of unassigned genes                      | 17.8               | 36.3        | 32.3             | 25.3          | 37                     | 26.1                     | 25.9         |
| Number of orthogroups containing species            | 10,352             | 11,523      | 11,356           | 11,087        | 9,090                  | 8,976                    | 10,242       |
| Percentage of orthogroups containing species        | 68.2               | 76          | 74.9             | 73.1          | 59.9                   | 59.2                     | 67.5         |
| Number of species-specific orthogroups              | 37                 | 37          | 37               | 38            | 70                     | 62                       | 10           |
| Number of genes in species-specific orthogroups     | 432                | 235         | 112              | 364           | 841                    | 434                      | 43           |
| Percentage of genes in species-specific orthogroups | 1.6                | 0.6         | 0.4              | 0.8           | 3.1                    | 1.9                      | 0.2          |

**Supplementary Table 12.** Enriched GO terms in orthogroups with overrepresentation in Angiosperms.

| <b>pathway ID</b> | <b>pathway description</b>                                                                                        | <b>observed<br/>gene count</b> | <b>false<br/>discovery rate</b> |
|-------------------|-------------------------------------------------------------------------------------------------------------------|--------------------------------|---------------------------------|
| GO.0043531        | ADP binding                                                                                                       | 65                             | 9.85E-64                        |
| GO.0015299        | solute:proton antiporter activity                                                                                 | 28                             | 8.71E-20                        |
| GO.0005451        | monovalent cation:proton antiporter activity<br>monovalent inorganic cation transmembrane<br>transporter activity | 22                             | 1.04E-19                        |
| GO.0015077        | hydrogen ion transmembrane transporter activity                                                                   | 50                             | 5.62E-19                        |
| GO.0015078        | terpene synthase activity                                                                                         | 39                             | 1.74E-17                        |
| GO.0010333        | inorganic cation transmembrane transporter activity                                                               | 21                             | 2.67E-17                        |
| GO.0022890        | hydrogen-exporting ATPase activity                                                                                | 58                             | 3.30E-16                        |
| GO.0008553        | cAMP binding                                                                                                      | 11                             | 2.94E-12                        |
| GO.0030552        | cGMP binding                                                                                                      | 14                             | 9.85E-12                        |
| GO.0080043        | quercetin 3-O-glucosyltransferase activity                                                                        | 14                             | 9.85E-12                        |
| GO.0080044        | quercetin 7-O-glucosyltransferase activity                                                                        | 22                             | 6.38E-11                        |
| GO.0030247        | polysaccharide binding                                                                                            | 22                             | 6.38E-11                        |
| GO.0005261        | cation channel activity                                                                                           | 18                             | 8.46E-11                        |
| GO.0032559        | adenyl ribonucleotide binding                                                                                     | 20                             | 4.11E-08                        |
| GO.0022836        | gated channel activity                                                                                            | 157                            | 5.68E-08                        |
| GO.0005249        | voltage-gated potassium channel activity                                                                          | 20                             | 1.88E-07                        |
| GO.0047893        | flavonol 3-O-glucosyltransferase activity                                                                         | 12                             | 9.43E-07                        |
| GO.0030145        | manganese ion binding                                                                                             | 8                              | 1.10E-06                        |
| GO.0005179        | hormone activity                                                                                                  | 14                             | 2.39E-06                        |
| GO.0000287        | magnesium ion binding                                                                                             | 13                             | 2.41E-06                        |
| GO.0004674        | protein serine/threonine kinase activity                                                                          | 24                             | 2.60E-06                        |
| GO.0045735        | nutrient reservoir activity                                                                                       | 68                             | 7.55E-06                        |
| GO.0015276        | ligand-gated ion channel activity                                                                                 | 14                             | 7.55E-06                        |
| GO.0080031        | methyl salicylate esterase activity                                                                               | 10                             | 1.64E-05                        |
| GO.0015075        | ion transmembrane transporter activity                                                                            | 5                              | 3.08E-05                        |
| GO.0005524        | ATP binding                                                                                                       | 52                             | 4.64E-05                        |
|                   |                                                                                                                   | 141                            | 6.26E-05                        |

**Supplementary Table 13.** Enriched KEGG pathways in orthogroups with overrepresentation in Angiosperms.

| <b>pathway ID</b> | <b>pathway description</b>     | <b>observed gene count</b> | <b>false discovery rate</b> |
|-------------------|--------------------------------|----------------------------|-----------------------------|
| 960               | alkaloid biosynthesis          | 12                         | 1.60E-05                    |
| 4120              | Ubiquitin mediated proteolysis | 19                         | 0.00625                     |
| 4626              | Plant-pathogen interaction     | 20                         | 0.029                       |

**Supplementary Table 14.** Enriched GO terms in orthogroups with overrepresentation in *Selaginella*.

| <b>pathway ID</b> | <b>pathway description</b>               | <b>observed<br/>gene count</b> | <b>false discovery<br/>rate</b> |
|-------------------|------------------------------------------|--------------------------------|---------------------------------|
| GO.0048207        | vesicle targeting, rough ER to cis-Golgi | 2                              | 0.00071                         |
| GO.0048208        | COPII vesicle coating                    | 2                              | 0.00071                         |
| GO.0090114        | COPII-coated vesicle budding             | 2                              | 0.00071                         |
| GO.0051650        | establishment of vesicle localization    | 2                              | 0.00506                         |
| GO.0042744        | hydrogen peroxide catabolic process      | 3                              | 0.025                           |

**Supplementary Table 15.** Enriched KEGG pathways in orthogroups with overrepresentation in *Selaginella*.

| <b>pathway ID</b> | <b>pathway description</b>                  | <b>observed<br/>gene count</b> | <b>false discovery<br/>rate</b> |
|-------------------|---------------------------------------------|--------------------------------|---------------------------------|
| 360               | Phenylalanine metabolism<br>Phenylpropanoid | 3                              | 0.0154                          |
| 940               | biosynthesis                                | 3                              | 0.0185                          |

**Supplementary Table 16.** Tandem gene duplicates induced during desiccation.

| Gene ID    | # in tandem array | Annotation                                      | RNAseq (TPM) |          |          |          |           |            |
|------------|-------------------|-------------------------------------------------|--------------|----------|----------|----------|-----------|------------|
|            |                   |                                                 | Sel_0 hr     | Sel_1hr  | Sel_6hr  | Sel_24hr | Sel_120hr | Sel_De24hr |
| Sle_012709 | 2                 | dehydrin                                        | 19860.3      | 25245.9  | 26737.73 | 8707.127 | 9400.985  | 34810.97   |
| Sle_012707 | 2                 | dehydrin                                        | 13236.13     | 15757.27 | 16746.37 | 6955.453 | 4596.25   | 18232.6    |
| Sle_002382 | 3                 | ELIP                                            | 5947.803     | 5237.77  | 5421.657 | 794.7973 | 103.3718  | 2305.329   |
| Sle_014211 | 8                 | ELIP                                            | 5352.087     | 5143.617 | 6006.04  | 752.3097 | 178.3909  | 2185.167   |
| Sle_021620 | 3                 | (R,S)-reticuline 7-O-methyltransferase          | 5315.37      | 3689.2   | 3473.317 | 1085.689 | 1849.709  | 2206.557   |
| Sle_015016 | 3                 | ELIP                                            | 4898.673     | 5739.09  | 5425.667 | 740.7287 | 105.3366  | 945.0467   |
| Sle_000102 | 2                 | ribulose biphosphate carboxylase small chain 1B | 3605.3       | 2626.357 | 3213.947 | 2660.827 | 8606.74   | 3876.18    |
| Sle_014207 | 8                 | ELIP                                            | 3569.097     | 4366.277 | 3440.22  | 426.0397 | 118.6547  | 1227.424   |
| Sle_021626 | 3                 | actinoporin                                     | 3559.582     | 2380.933 | 2279.9   | 2265.313 | 1068.367  | 1427.953   |
| Sle_014212 | 8                 | ELIP                                            | 2441.887     | 2533.25  | 2492.473 | 374.6957 | 140.3598  | 1361.857   |
| Sle_015015 | 3                 | ELIP                                            | 2251.303     | 2068.557 | 2262.563 | 420.9243 | 68.6149   | 617.4533   |
| Sle_003590 | 2                 | caleosin                                        | 2147.48      | 2589.75  | 2804.44  | 730.4543 | 366.5695  | 1959.687   |
| Sle_012388 | 2                 | oleosin                                         | 2112.603     | 2798.82  | 2596.277 | 951.7137 | 552.873   | 3184.917   |
| Sle_007889 | 2                 | oleosin                                         | 2025.057     | 2005.73  | 1972.26  | 277.3123 | 124.0364  | 862.3717   |
| Sle_003538 | 2                 | hypothetical Oxygen-evolving enhancer protein   | 1581.513     | 1943.3   | 2097.227 | 1344.647 | 1133.284  | 1549.75    |
| Sle_010581 | 2                 | 1                                               | 1488.293     | 1260.893 | 1111.571 | 1803.993 | 3057.67   | 899.311    |
| Sle_009642 | 2                 | hedgehog protein                                | 1454.837     | 2607.613 | 2396.331 | 1331.431 | 2615.815  | 1949.023   |
| Sle_014210 | 8                 | ELIP                                            | 1422.937     | 1821.233 | 1724.272 | 183.1617 | 43.08995  | 136.7193   |
| Sle_014209 | 8                 | ELIP                                            | 1404.191     | 1702.453 | 1395.273 | 180.9858 | 31.13525  | 272.7183   |
| Sle_024166 | 2                 | HSP                                             | 1135.277     | 908.5877 | 1192.659 | 834.1273 | 41.78465  | 107.8245   |
| Sle_005885 | 2                 | quinone oxidoreductase                          | 996.786      | 992.4773 | 892.972  | 585.2337 | 461.4305  | 806.7607   |
| Sle_000989 | 2                 | glutathione S transferase                       | 974.811      | 911.782  | 909.6337 | 792.3367 | 846.0455  | 943.241    |
| Sle_002390 | 2                 | oxidoreductase                                  | 926.5847     | 967.0173 | 888.632  | 190.2527 | 273.411   | 618.333    |

|            |   |                                                      |          |          |          |          |          |          |
|------------|---|------------------------------------------------------|----------|----------|----------|----------|----------|----------|
| Sle_014206 | 8 | 40S ribosome                                         | 900.94   | 963.3943 | 818.2637 | 1307.9   | 546.836  | 1243.437 |
| Sle_007803 | 2 | HSP                                                  | 857.2963 | 771.9047 | 835.075  | 723.8253 | 244.2675 | 385.7747 |
| Sle_010272 | 2 | sucrose transport protein SUT2                       | 817.2857 | 833.618  | 914.1527 | 252.4047 | 315.6265 | 731.058  |
| Sle_014203 | 8 | elip                                                 | 807.556  | 1291.413 | 792.083  | 279.8271 | 54.1481  | 205.5453 |
| Sle_004563 | 2 | stress responsive protein [Zea<br>mays]              | 765.2367 | 610.4017 | 612.0637 | 375.0683 | 410.62   | 648.98   |
| Sle_008375 | 2 | ricin B-like lectin<br>probable flavin-containing    | 641.525  | 727.319  | 760.3923 | 315.8133 | 356.314  | 825.8673 |
| Sle_016272 | 7 | monooxygenase 1                                      | 612.8717 | 2262.248 | 9594.367 | 9276.867 | 14300.55 | 428.471  |
| Sle_002978 | 2 | hypothetical protein                                 | 611.5091 | 276.9507 | 191.0872 | 60.68521 | 443.166  | 190.816  |
| Sle_008542 | 2 | HSP                                                  | 557.379  | 461.984  | 697.5757 | 344.969  | 10.74791 | 46.91903 |
| Sle_018502 | 2 | HSP                                                  | 551.5403 | 377.5227 | 512.9093 | 952.5367 | 458.298  | 313.9707 |
| Sle_005883 | 2 | carbonic anhydrase<br>dehydration-responsive element | 548.5533 | 444.768  | 692.5117 | 443.5267 | 1185.645 | 817.666  |
| Sle_016705 | 4 | binding protein 2                                    | 540.7077 | 420.4193 | 565.7143 | 417.1933 | 183.3795 | 396.4697 |
| Sle_018503 | 2 | Thiosulfate sulfurtransferase 16                     | 488.6333 | 534.1037 | 421.8857 | 470.275  | 425.729  | 525.384  |
| Sle_007925 | 3 | ATP-binding protein                                  | 477.592  | 333.8573 | 352.7967 | 410.229  | 424.3175 | 642.7573 |
| Sle_004564 | 2 | ricin B-like lectin                                  | 469.3307 | 345.292  | 263.5537 | 239.3123 | 372.57   | 254.5963 |
| Sle_011308 | 2 | 60S ribosomal proteins                               | 439.5363 | 467.8273 | 445.3357 | 670.7167 | 393.49   | 527.5097 |
| Sle_006185 | 3 | SUMO-conjugating enzyme SCE1                         | 413.3453 | 374.9207 | 348.166  | 310.4457 | 304.7875 | 346.5297 |
| Sle_011169 | 4 | Cold-regulated plasma membrane                       | 393.2983 | 406.875  | 478.29   | 191.6063 | 499.5685 | 851.328  |
| Sle_010829 | 3 | unknown                                              | 381.436  | 186.5667 | 156.2967 | 272.765  | 412.1925 | 606.4583 |
| Sle_025239 | 2 | S-adenosyl homocysteine hydrolase                    | 380.8653 | 333.4577 | 350.9593 | 1118.381 | 1524.445 | 1100.355 |
| Sle_021623 | 3 | actinoporin                                          | 380.129  | 440.6813 | 430.626  | 334.4513 | 393.3145 | 251.3643 |
| Sle_002346 | 2 | putative nitrite transporter                         | 375.6333 | 288.591  | 290.0983 | 150.1027 | 431.65   | 400.3697 |
| Sle_010053 | 4 | short-chain dehydrogenase TIC 32                     | 367.848  | 290.8877 | 306.983  | 279.592  | 193.0535 | 328.652  |
| Sle_015196 | 3 | outer membrane protein porin                         | 337.2352 | 264.1202 | 595.4063 | 2092.997 | 9.013955 | 686.4511 |
| Sle_024087 | 7 | Aldo-keto reductase family 4                         | 335.28   | 315.7547 | 346.5427 | 163.385  | 259.194  | 507.7413 |
| Sle_005398 | 2 | unknown                                              | 327.121  | 365.18   | 408.4043 | 143.244  | 36.91195 | 181.976  |
| Sle_010252 | 2 | unknown                                              | 323.442  | 349.2993 | 337.4917 | 347.4463 | 143.0615 | 237.3693 |
| Sle_006321 | 2 | isoflavone reductase                                 | 323.2913 | 291.1133 | 328.4953 | 1025.229 | 658.172  | 657.5103 |
| Sle_007185 | 3 | Ras-related protein RABC1                            | 312.3637 | 335.0633 | 320.2547 | 200.957  | 125.3675 | 288.7383 |



|            |   |                                                     |          |          |          |          |          |          |
|------------|---|-----------------------------------------------------|----------|----------|----------|----------|----------|----------|
|            |   | Cytochrome c oxidase copper                         |          |          |          |          |          |          |
| Sle_009916 | 2 | chaperone 1                                         | 307.7633 | 382.6257 | 363.619  | 937.8653 | 235.7095 | 495.1983 |
| Sle_017181 | 4 | steroleosin                                         | 304.212  | 340.173  | 422.2007 | 122.164  | 91.70155 | 172.712  |
| Sle_009295 | 2 | ribosomal protein S10                               | 297.231  | 374.112  | 315.1053 | 239.423  | 287.6905 | 226.3807 |
| Sle_006214 | 2 | glutamate decarboxylase                             | 288.8383 | 246.322  | 253.3633 | 196.6037 | 294.1725 | 183.073  |
| Sle_011721 | 2 | tyrosine kinase family protein                      | 287.3563 | 275.9683 | 274.6417 | 372.2803 | 418.0155 | 284.404  |
| Sle_000221 | 4 | unknown                                             | 280.86   | 257.857  | 280.8367 | 281.1837 | 261.741  | 511.865  |
| Sle_009022 | 2 | unknown                                             | 265.6893 | 160.635  | 349.7583 | 196.0207 | 261.304  | 179.709  |
| Sle_011162 | 2 | small auxin up RNA1                                 | 263.647  | 282.6707 | 267.7683 | 346.1753 | 157.263  | 340.4007 |
| Sle_020291 | 2 | Beta glucosidase 40                                 | 249.52   | 207.6163 | 184.364  | 127.1325 | 415.047  | 381.8013 |
| Sle_014760 | 2 | beta-glucosidase 12                                 | 242.7647 | 224.772  | 262.5537 | 201.3837 | 676.7105 | 327.655  |
| Sle_005285 | 2 | Heat shock protein 81                               | 242.1087 | 133.1723 | 311.77   | 905.796  | 384.854  | 424.5317 |
| Sle_004977 | 2 | 40S ribosomal protein                               | 235.5503 | 249.4237 | 247.5023 | 360.935  | 190.98   | 318.9813 |
| Sle_006197 | 2 | phosphoglycerate kinase                             | 232.5847 | 217.1067 | 215.4597 | 143.712  | 274.415  | 292.2877 |
| Sle_002366 | 4 | cytokinin hydroxylase                               | 231.8587 | 189.6013 | 201.673  | 171.1223 | 332.079  | 221.4533 |
| Sle_026138 | 4 | unknown                                             | 213.0207 | 316.5467 | 316.574  | 192.7877 | 138.5315 | 112.1706 |
| Sle_007765 | 2 | sterol 8,7-isomerase                                | 207.8693 | 226.2993 | 204.8843 | 99.31023 | 117.681  | 144.1957 |
| Sle_004193 | 2 | Select seq ref XP_020528179.1                       | 207.0383 | 193.7113 | 222.5623 | 1222.7   | 269.0735 | 336.3983 |
| Sle_007747 | 2 | unknown                                             | 200.613  | 156.717  | 183.557  | 103.4894 | 45       | 192.3417 |
| Sle_003575 | 2 | CAAX amino terminal protease                        | 199.2977 | 167.0157 | 121.1442 | 178.3223 | 145.6205 | 261.9347 |
| Sle_002964 | 2 | Zinc finger, FYVE-type                              | 197.5907 | 132.418  | 141.9527 | 61.1329  | 118.524  | 56.10377 |
| Sle_007672 | 2 | caffeoyl-CoA O-methyltransferase                    | 185.32   | 204.07   | 220.7437 | 299.687  | 1046.636 | 277.148  |
| Sle_001415 | 8 | protein TAB2 homolog                                | 180.1617 | 160.2293 | 135.983  | 243.136  | 286.376  | 129.7263 |
| Sle_003998 | 2 | glutaredoxin                                        | 178.5453 | 162.476  | 158.218  | 156.041  | 54.02505 | 143.439  |
| Sle_006364 | 2 | chalcone-flavonone isomerase                        | 172.7947 | 176.3793 | 129.7297 | 492.2077 | 485.7365 | 796.425  |
| Sle_000103 | 3 | Alpha-crystallin domain 32.1,<br>putative isoform 2 | 168.0667 | 178.7177 | 171.8193 | 78.7705  | 33.7112  | 129.5683 |
| Sle_013083 | 5 | protein FEZ-like                                    | 166.9843 | 165.5843 | 152.7297 | 207.98   | 393.666  | 116.9981 |
| Sle_007899 | 2 | ELIP                                                | 166.341  | 154.6141 | 104.1234 | 41.13103 | 23.3967  | 49.76063 |
| Sle_001411 | 2 | Alpha/beta-Hydrolases                               | 164.2207 | 151.205  | 130.3163 | 136.255  | 90.87535 | 168.8063 |
| Sle_003925 | 2 | Universal stress protein                            | 161.541  | 140.7293 | 144.437  | 173.2333 | 74.89375 | 152.8547 |

|            |   |                                                                         |          |          |          |          |          |          |
|------------|---|-------------------------------------------------------------------------|----------|----------|----------|----------|----------|----------|
| Sle_012971 | 2 | PITH domain-containing protein 1                                        | 151.741  | 157.795  | 165.894  | 114.055  | 87.9862  | 133.4263 |
| Sle_003678 | 2 | LEA1                                                                    | 148.0903 | 190.1143 | 315.8    | 150.8417 | 29.7065  | 94.00193 |
| Sle_025334 | 2 | sucrose transport protein SUC3                                          | 143.078  | 117.6204 | 129.7793 | 43.34137 | 57.8068  | 77.41013 |
| Sle_014364 | 3 | ZIP family metal transporter                                            | 142.358  | 144.078  | 156.6483 | 68.0439  | 57.68425 | 117.4427 |
| Sle_001250 | 2 | short-chain dehydrogenase                                               | 119.594  | 136.3597 | 106.364  | 69.78187 | 70.44895 | 68.4713  |
| Sle_005027 | 4 | ubiquitin-protein ligase<br>peroxisomal adenine nucleotide<br>carrier 1 | 119.3033 | 106.3108 | 115.5925 | 86.44987 | 78.97225 | 114.122  |
| Sle_021282 | 4 | EPF-type Cis2-His2 zinc finger<br>transcription factor                  | 112.5925 | 113.7027 | 107.483  | 61.2     | 47.42825 | 77.6918  |
| Sle_007594 | 2 | UV radiation resistance<br>protein/autophagy-related protein            | 112.4168 | 92.47633 | 81.0742  | 52.33887 | 37.26695 | 54.06327 |
| Sle_011054 | 5 | 14                                                                      | 104.628  | 93.51503 | 91.67127 | 43.83487 | 46.3518  | 72.66547 |
| Sle_003782 | 2 | Exportin-1                                                              | 104.3811 | 112.2093 | 104.4566 | 66.7854  | 113.262  | 74.07007 |

1 **Supplementary Table 17.** Summary of LEA proteins in *Selaginella* genomes.

| <b>LEA subfamily</b> | <i>S. lepidophylla</i> | <i>S. moellendorffii</i> |
|----------------------|------------------------|--------------------------|
| LEA1                 | 3                      | 1                        |
| LEA2                 | 31                     | 19                       |
| LEA4                 | 2                      | 2                        |
| LEA5                 | 14                     | 8                        |
| Dehydrin             | 4                      | 2                        |
| SMP                  | 11                     | 4                        |
| <b>Total</b>         | <b>65</b>              | <b>36</b>                |

2

3

4

5 **Supplementary Table 18.** Relative water content of *S. lepidophylla* during the rehydration time-  
6 course.

7

| <b>Timepoint (post rehydration)</b> | <b>Relative water content (% <math>\pm</math> SD)</b> |
|-------------------------------------|-------------------------------------------------------|
| 0 hr                                | 11.2 $\pm$ 1.1                                        |
| 1 hr                                | 14.3 $\pm$ 4.9                                        |
| 2 hr                                | 21.4 $\pm$ 2.7                                        |
| 6 hr                                | 28.5 $\pm$ 3.4                                        |
| 12 hr                               | 43.2 $\pm$ 3.2                                        |
| 24 hr                               | 68.4 $\pm$ 6.5                                        |
| 120 hr                              | 75.3 $\pm$ 2.3                                        |
| 24 hr (dehydrated)                  | 15.3 $\pm$ 2.5                                        |

8

9
